# Supplementary material for: Combining histological grade, TILs, and the PD-1/PD-L1 pathway to identify immunogenic tumors and de-escalate radiotherapy in early breast cancer: a secondary analysis of a randomized clinical trial
Source: PubMed Central journal article supplement (PMC10201214; doi:10.1136/jitc-2022-006618), 2023-05-19
Supplement: jitc-2022-006618supp001.pdf [file jitc-2022-006618supp001.pdf]

**Supplement**

## Table of contents

|                                                                                                                                          |           |
|------------------------------------------------------------------------------------------------------------------------------------------|-----------|
| <b>Figure S1. Association of Proliferative index with histological grade .....</b>                                                       | <b>3</b>  |
| <b>Figure S2. Cumulative incidence of IBTR in the high-risk group with increasing levels of TILs .....</b>                               | <b>4</b>  |
| <b>Table S1. Comparison of included versus excluded patients .....</b>                                                                   | <b>5</b>  |
| <b>Table S2. Cox regression regarding IBTR with 5-year follow-up among all patients.....</b>                                             | <b>6</b>  |
| <b>Table S3. Cox regression regarding IBTR with 5-year follow-up among low-risk tumors.....</b>                                          | <b>7</b>  |
| <b>Table S4. Cox regression regarding IBTR with 5-year follow-up among high-risk tumors.....</b>                                         | <b>8</b>  |
| <b>Table S5. Estrogen receptor expression levels in the high- and low-risk groups .....</b>                                              | <b>9</b>  |
| <b>Table S6. Levels of TILs among patients with TILs <math>\geq 10\%</math> with and without PD-1/PD-L1 expression .....</b>             | <b>10</b> |
| <b>Table S7. Cox proportional hazard rate regression excluding those with systemic treatment.....</b>                                    | <b>11</b> |
| <b>Table S8. Cox proportional hazard rate regression among low- and high-risk patients excluding those with systemic treatment .....</b> | <b>12</b> |
| <b>Examples of positive and negative staining of PD-1/PD-L1 .....</b>                                                                    | <b>13</b> |
| <b>Staining protocols for PD-1 and PD-L1 stainings .....</b>                                                                             | <b>14</b> |

Figure S1. Association of Proliferative Index with histological grade in the SweBCG91RT cohort

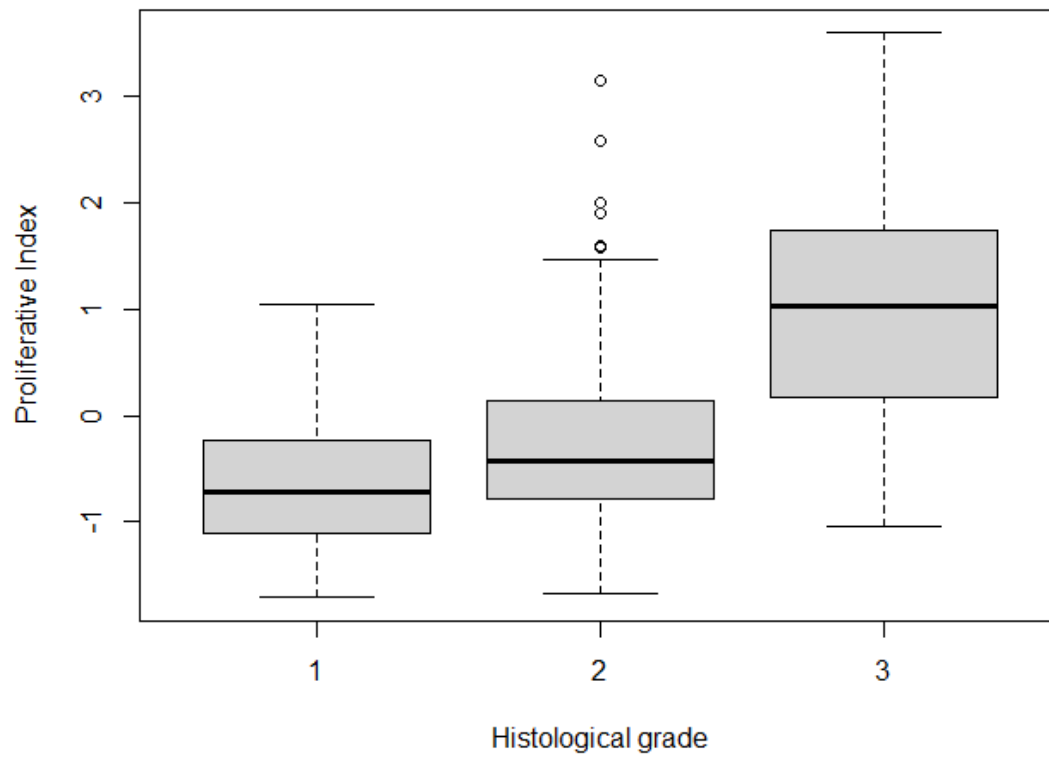

Figure S2. Cumulative incidence of IBTR in the high-risk group with increasing levels of TILs

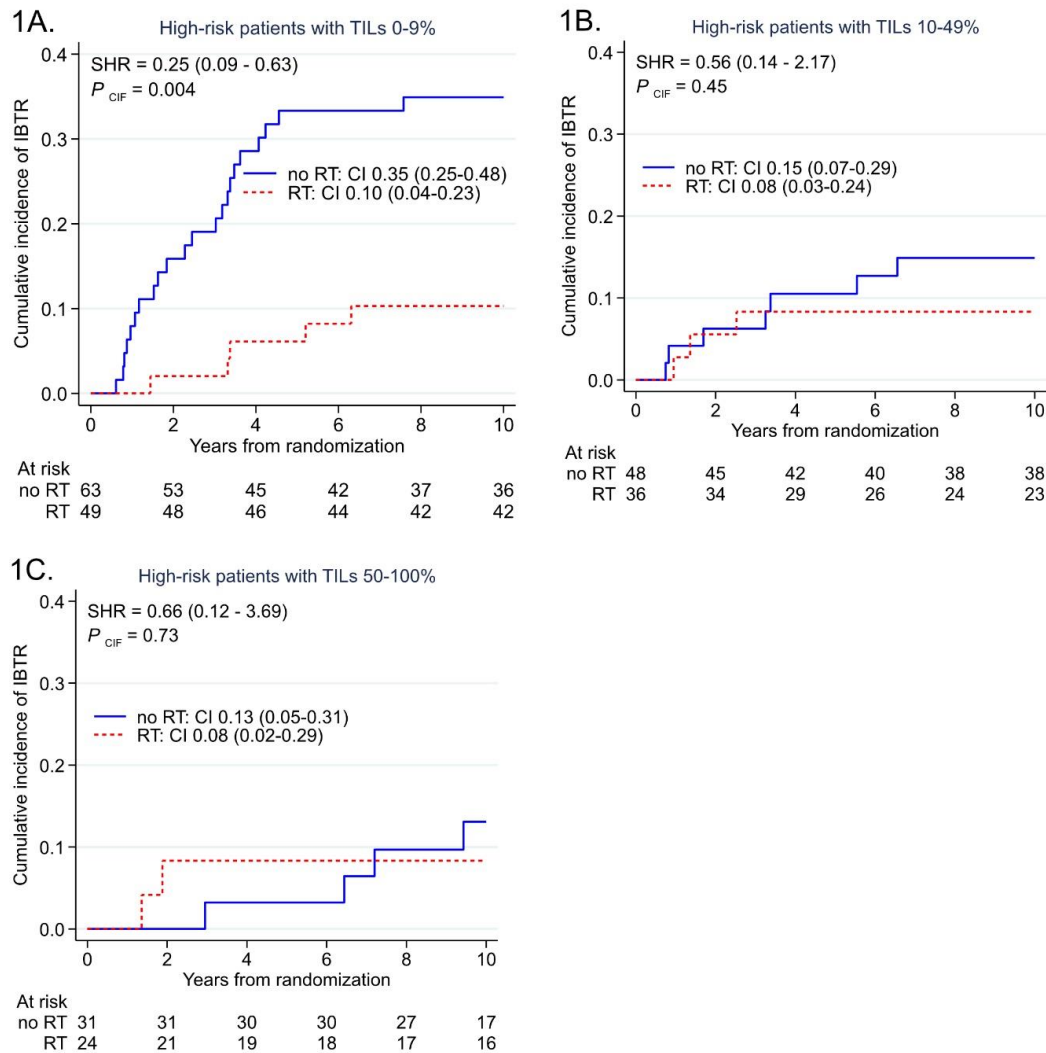

RT= Radiotherapy. TILs= Tumor-infiltrating lymphocytes. SHR= Subhazard ratio for RT versus no RT. CI= Cumulative incidence.

Table S1. Comparison of included versus excluded patients

| Variables                  | Included  | Excluded  | P      |
|----------------------------|-----------|-----------|--------|
| Age median                 | 59        | 61        |        |
| Age mean                   | 58.47     | 59.50     | 0.060  |
| Age min                    | 31        | 32        |        |
| Age max                    | 78        | 78        |        |
| RT treated no              | 437 (53%) | 178 (49%) | 0.21   |
| RT treated yes             | 387 (47%) | 185 (51%) |        |
| 1-10 mm                    | 183 (22%) | 126 (35%) | <0.001 |
| 11-15 mm                   | 419 (51%) | 162 (45%) |        |
| 16-20 mm                   | 95 (12%)  | 30 (8%)   |        |
| >20 mm                     | 122 (15%) | 41 (11%)  |        |
| Size missing               | 5         | 4         |        |
| Histological grade I       | 141 (17%) | 7 (5%)    | 0.013  |
| Histological grade II      | 451 (55%) | 122 (91%) |        |
| Histological grade III     | 232 (28%) | 5 (4%)    |        |
| Histological grade missing | 0         | 229       |        |
| Systemic treatment yes     | 681 (92%) | 336 (93%) | 0.64   |
| Systemic treatment no      | 62 (8%)   | 27 (7%)   |        |

Table S2. Cox proportional hazard rate regression. 5-year follow-up of local recurrence (IBTR).

| Variable                                       | # of IBTR/<br># of patients | Univariable Cox regression |        | Multivariable Cox regression |        |
|------------------------------------------------|-----------------------------|----------------------------|--------|------------------------------|--------|
|                                                |                             | HR (95% CI)                | P      | HR (95% CI)                  | P      |
| Combination of Immune system<br>and Risk group |                             |                            |        |                              |        |
| Not activated, low risk                        | 40/544                      | 1.0                        |        | 1.0                          |        |
| Not activated, high risk                       | 30/155                      | 3.0 (1.9-4.9)              | <0.001 | 2.7 (1.7-4.4)                | <0.001 |
| Activated, low risk                            | 4/29                        | 2.2 (0.81-6.3)             | 0.121  | 1.8 (0.66-5.2)               | 0.242  |
| Activated, high risk                           | 5/96                        | 0.75 (0.30-1.9)            | 0.553  | 0.69 (0.27-1.8)              | 0.439  |
| Interaction                                    |                             |                            | 0.005* |                              | 0.010* |
| Age (cont.)                                    | 79/824                      | 0.97 (0.95-0.99)           | 0.014  | 0.97 (0.95-0.99)             | 0.013  |
| Tumor size (cont.)                             | 71/738                      | 1.02 (0.98-1.06)           | 0.380  | -                            |        |
| ER                                             |                             |                            |        |                              |        |
| Negative                                       | 12/94                       | 1.0                        |        | -                            |        |
| Positive                                       | 67/726                      | 0.63 (0.34-1.17)           | 0.147  | -                            |        |
| RT                                             |                             |                            |        |                              |        |
| No                                             | 64/437                      | 1.0                        |        | 1.0                          |        |
| Yes                                            | 15/387                      | 0.25 (0.14-0.44)           | <0.001 | 0.27 (0.15-0.47)             | <0.001 |

\*Likelihood-ratio test.

Table S3. Cox proportional hazard rate regression. 5-year follow-up of local recurrence (IBTR) among low risk-patients (n=573)

| Variable             | # of IBTR/<br># of patients | Univariable Cox regression |        | Multivariable Cox regression |        |
|----------------------|-----------------------------|----------------------------|--------|------------------------------|--------|
|                      |                             | HR (95% CI)                | P      | HR (95% CI)                  | P      |
| <b>Immune system</b> |                             |                            |        |                              |        |
| Not activated        | 40/544                      | 1.0                        |        | 1.0                          |        |
| Activated            | 4/29                        | 2.3 (0.81-6.3)             | 0.121  | 1.9 (0.69-5.4)               | 0.210  |
|                      |                             |                            |        |                              |        |
| Age (cont.)          | 44/573                      | 0.99 (0.96-1.0)            | 0.582  | -                            | -      |
| Tumor size (cont.)   |                             | 1.0 (0.95-1.1)             | 0.732  | -                            | -      |
| <b>ER</b>            |                             |                            |        |                              |        |
| Negative             | 4/9                         | 1.0                        |        | 1.0                          |        |
| Positive             | 40/561                      | 0.12 (0.04-0.33)           | <0.001 | 0.09 (0.03-0.25)             | <0.001 |
| <b>RT*</b>           |                             |                            |        |                              |        |
| No                   | 37/295                      | 1.0                        |        | 1.0                          |        |
| Yes                  | 7/278                       | 0.19 (0.08-0.42)           | <0.001 | 0.18 (0.08-0.41)             | <0.001 |

Table S4.

Cox proportional hazard rate regression. 5-year follow-up of local recurrence (IBTR) among high-risk patients (n=251)

| Variable           | # of IBTR/<br># of patients | Univariable Cox regression |       | Multivariable Cox regression |       |
|--------------------|-----------------------------|----------------------------|-------|------------------------------|-------|
|                    |                             | HR (95% CI)                | P     | HR (95% CI)                  | P     |
| Immune system      |                             |                            |       |                              |       |
| Not activated      | 30/155                      | 1.0                        |       | 1.0                          |       |
| Activated          | 5/96                        | 0.25 (0.10-0.65)           | 0.005 | 0.25 (0.10-0.64)             | 0.004 |
| Age (cont.)        | 35/251                      | 0.95 (0.92-0.99)           | 0.006 | 0.96 (0.93-0.99)             | 0.005 |
| Tumor size (cont.) | 31/208                      | 1.0 (0.94-1.1)             | 0.908 | -                            | -     |
| ER                 |                             |                            |       |                              |       |
| Negative           | 8/85                        | 1.0                        |       |                              |       |
| Positive           | 27/165                      | 1.6 (0.75-3.64)            | 0.212 | -                            | -     |
| RT*                |                             |                            |       |                              |       |
| No                 | 27/142                      | 1.0                        |       | 1.0                          |       |
| Yes                | 8/109                       | 0.36 (0.16-0.79)           | 0.011 | 0.44 (0.20-0.97)             | 0.041 |



**Table S5. Estrogen receptor expression levels in the high- and low-risk groups**

| <b>Risk group<br/>(column<br/>percent/row<br/>percent)</b> | <b>0%</b>           | <b>1-9%</b>     | <b>10-49</b>      | <b>50-74%</b>     | <b>75-100%</b>       | <b>P*</b> |
|------------------------------------------------------------|---------------------|-----------------|-------------------|-------------------|----------------------|-----------|
| Low-risk                                                   | 12<br>(13.6%/2.2%)  | 4<br>(80%/0.7%) | 3<br>(37.5%/0.6%) | 5<br>(62.5%/0.9%) | 514<br>(80.9%/95.5%) |           |
| High-risk                                                  | 76<br>(86.4%/36.9%) | 1<br>(20%/0.5%) | 5<br>(62.5%/2.4%) | 3<br>(37.5%/1.5%) | 121<br>(19.1%/58.7%) | <0.001    |

\*Fisher's exact test

More than half of the tumors in the high-risk category demonstrated a high estrogen receptor expression. Around one in five (19.1%) strongly ER-positive tumors may be hypothesized to be immune responsive based on this data, which may indicate that subtype alone is insufficient to identify these tumors.

**Table S6. Levels of TILs among patients with TILs  $\geq 10\%$  with and without PD-1/PD-L1 expression**

| Groups                |     | TILs 10-49% | TILs 50-74% | TILs 75-100% | P*     |
|-----------------------|-----|-------------|-------------|--------------|--------|
| PD-1/PD-L1 expression | No  | 97 (89.0%)  | 10 (9.2%)   | 2 (1.8%)     | <0.001 |
|                       | Yes | 66 (58.9%)  | 29 (25.9%)  | 17 (15.2%)   |        |

\*Fisher's exact test

PD-1/PD-L1 expression was defined as the expression of PD-1 or PD-L1 in  $\geq 1\%$  of lymphocytes in at least one TMA. Among tumors with TILs  $\geq 10\%$ , PD-1/PD-L1 expression was associated with higher TILs levels

Table S7. Cox proportional hazard rate regression of ipsilateral breast tumor recurrence (IBTR) with

|                                            |                              | Univariable Cox regression |                  | Multivariable Cox regression |                  |        |
|--------------------------------------------|------------------------------|----------------------------|------------------|------------------------------|------------------|--------|
| Variables                                  | No. of IBTRs/No. of patients | HR (95% CI)                | P                | HR (95% CI)                  | P                |        |
| Combination of immune group and risk group |                              |                            |                  |                              |                  |        |
|                                            | Not activated, low risk      | 70/512                     | 1.0              | 1.0                          |                  |        |
|                                            | Not activated, high risk     | 33/132                     | 2.2 (1.5-3.4)    | <0.001                       | 2.1 (1.4-3.2)    | <0.001 |
|                                            | Activated, low risk          | 6/27                       | 2.1 (0.91-4.8)   | 0.080                        | 1.9 (0.81-4.3)   | 0.144  |
|                                            | Activated, high risk         | 7/79                       | 0.69 (0.32-1.5)  | 0.349                        | 0.65 (0.30-1.4)  | 0.285  |
|                                            | Interaction                  |                            |                  | 0.002*                       |                  | 0.005* |
| Age (cont.)                                | 116/750                      | 0.97 (0.95-0.99)           | 0.005            | 0.97 (0.96-0.99)             | 0.005            |        |
| Tumor size (cont.)                         | 106/676                      | 1.02 (0.98-1.06)           | 0.403            | -                            |                  |        |
| ER status                                  | Negative                     | 13/72                      | 1.0              | -                            |                  |        |
|                                            | Positive                     | 103/674                    | 0.72 (0.40-1.28) | 0.259                        | -                |        |
| RT <sup>#</sup>                            | No                           | 85/391                     | 1.0              | 1.0                          |                  |        |
|                                            | Yes                          | 31/359                     | 0.36 (0.24-0.54) | <0.001                       | 0.38 (0.25-0.57) | <0.001 |

10-year follow-up excluding patients with systemic treatment (n=74)

\*Likelihood-ratio test.

**Table S8. Cox proportional hazard rate regression of ipsilateral breast tumor recurrence (IBTR) 10-year follow-up among low-risk- and high-risk patients excluding patients with systemic treatment (n=74)**

| Variable           | Low-risk group (n=539)      |                                              |        |                                                   |        | High-risk group (n=211)        |                                              |       |                                                |       |
|--------------------|-----------------------------|----------------------------------------------|--------|---------------------------------------------------|--------|--------------------------------|----------------------------------------------|-------|------------------------------------------------|-------|
|                    | # of IBTR/<br># of patients | Univariable<br>Cox regression<br>HR (95% CI) | P      | Multivariable<br>Cox<br>regression<br>HR (95% CI) | P      | # of<br>IBTR/<br># of patients | Univariable<br>Cox regression<br>HR (95% CI) | P     | Multivariable<br>Cox regression<br>HR (95% CI) | P     |
| Immune system      |                             |                                              |        |                                                   |        |                                |                                              |       |                                                |       |
| Not activated      | 70/512                      | 1.0                                          |        | 1.0                                               |        | 33/132                         | 1.0                                          |       | 1.0                                            |       |
| Activated          | 6/27                        | 2.1 (0.93-4.9)                               | 0.075  | 2.0 (0.85-4.5)                                    | 0.115  | 7/79                           | 0.32 (0.14-0.72)                             | 0.006 | 0.32 (0.14-0.74)                               | 0.007 |
| Age (cont.)        | 76/539                      | 0.98 (0.96-1.0)                              | 0.119  | -                                                 | -      | 40/211                         | 0.96 (0.94-0.99)                             | 0.018 | 0.97 (0.94-1.0)                                | 0.021 |
| Tumor size (cont.) | 70/498                      | 1.0 (0.97-1.1)                               | 0.378  | -                                                 | -      | 36/178                         | 0.99 (0.93-1.1)                              | 0.730 | -                                              | -     |
| ER                 |                             |                                              |        |                                                   |        |                                |                                              |       |                                                |       |
| Negative           | 3/8                         | 1.0                                          |        | 1.0                                               |        | 10/64                          | 1.0                                          |       |                                                |       |
| Positive           | 73/528                      | 0.29 (0.09-0.91)                             | 0.034  | 0.23 (0.07-0.73)                                  | 0.012  | 30/146                         | 1.2 (0.60-2.5)                               | 0.580 | -                                              | -     |
| RT <sup>#</sup>    |                             |                                              |        |                                                   |        |                                |                                              |       |                                                |       |
| No                 | 53/274                      | 1.0                                          |        | 1.0                                               |        | 32/117                         | 1.0                                          |       | 1.0                                            |       |
| Yes                | 23/265                      | 0.41 (0.25-0.66)                             | <0.001 | 0.40 (0.25-0.66)                                  | <0.001 | 8/94                           | 0.29 (0.13-0.62)                             | 0.002 | 0.32 (0.15-0.69)                               | 0.004 |

**Stainings of PD-1/PD-L1****Negative staining**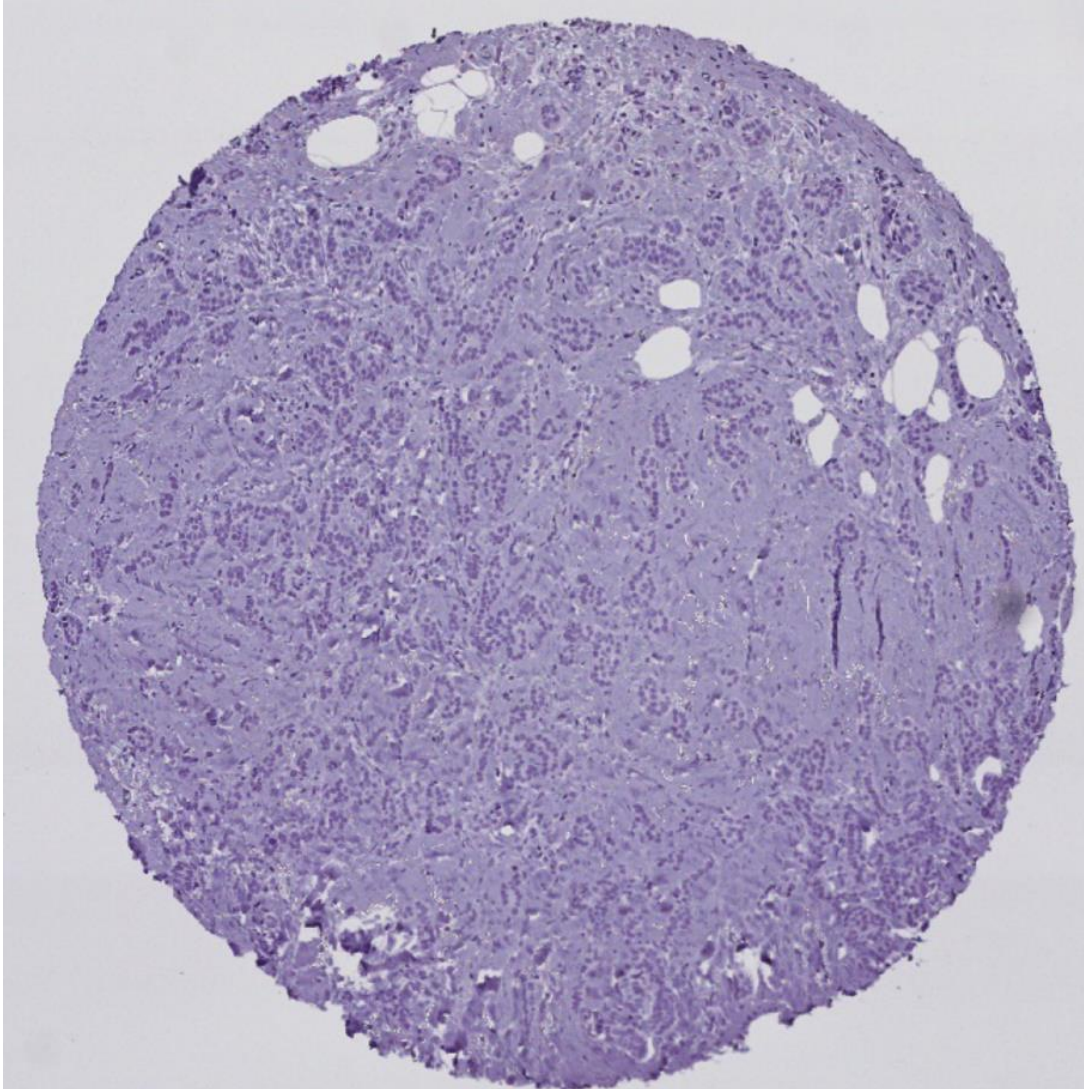

Positive staining (1-9% of lymphocytes)

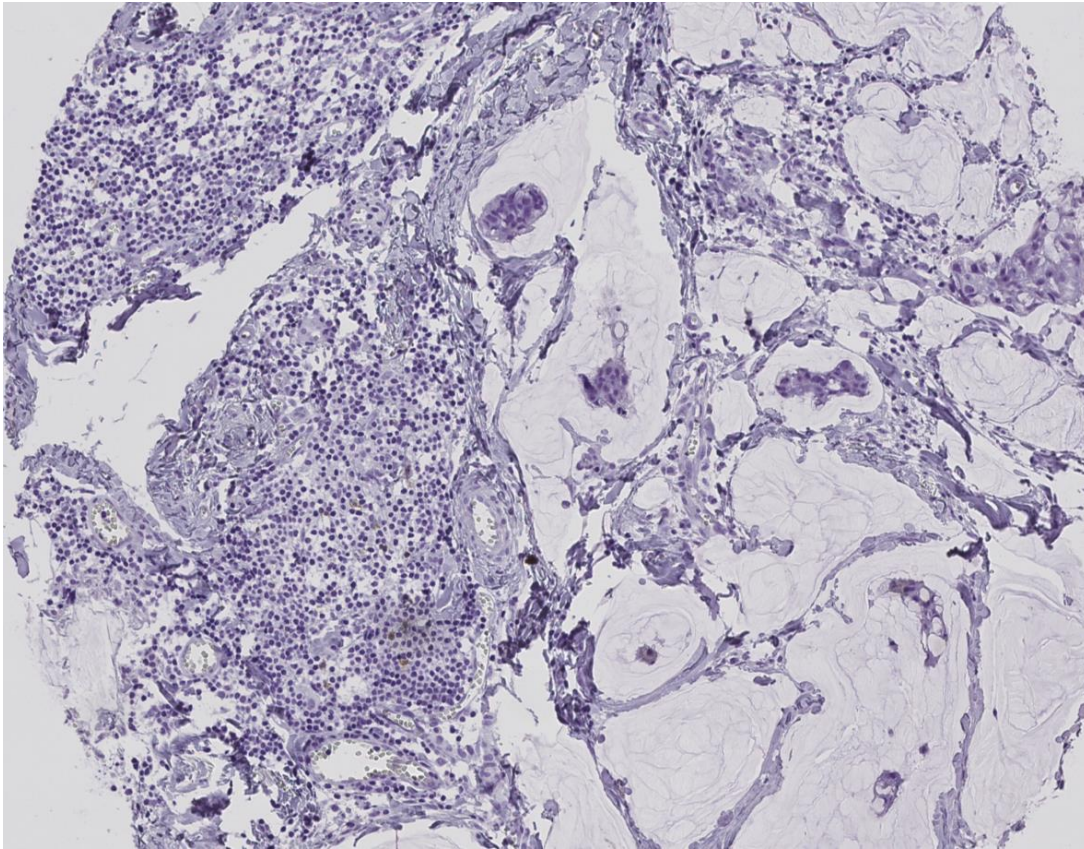

Positive staining (previous image zoomed)

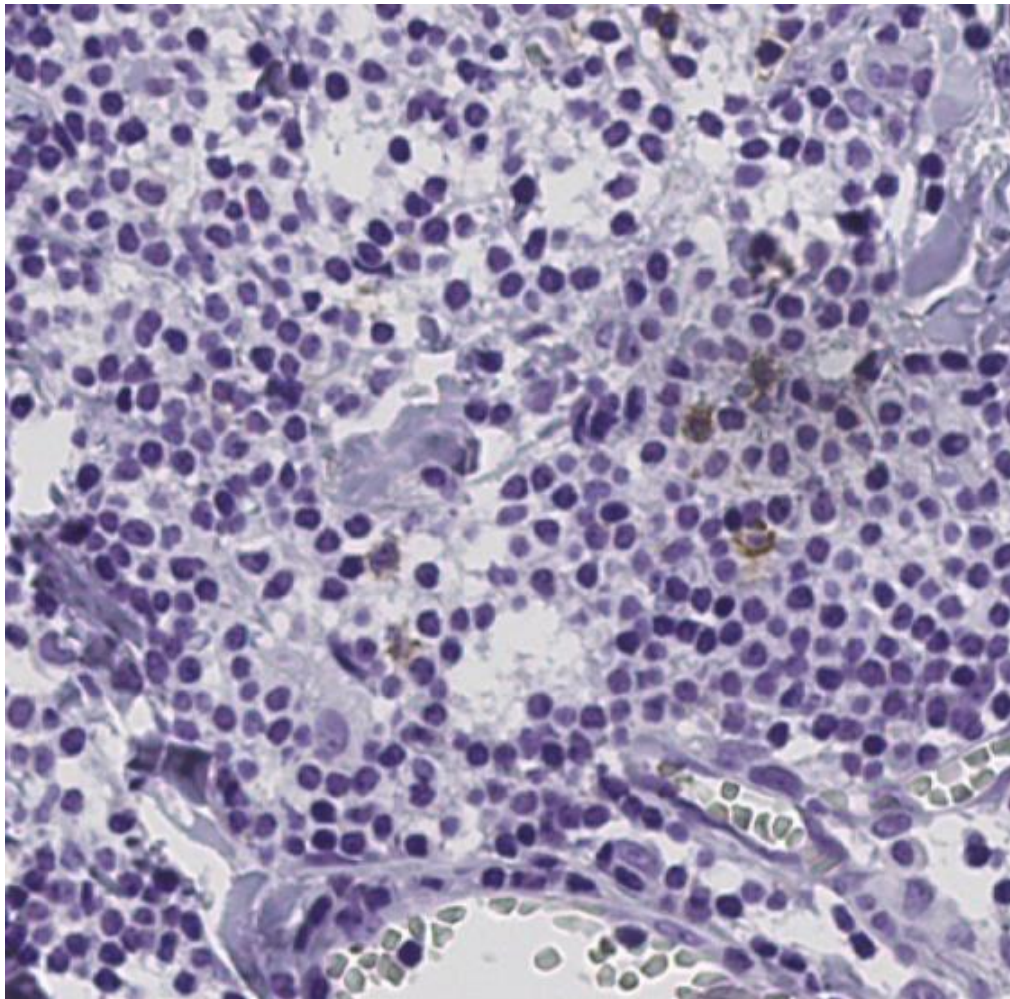

TILs present but no staining

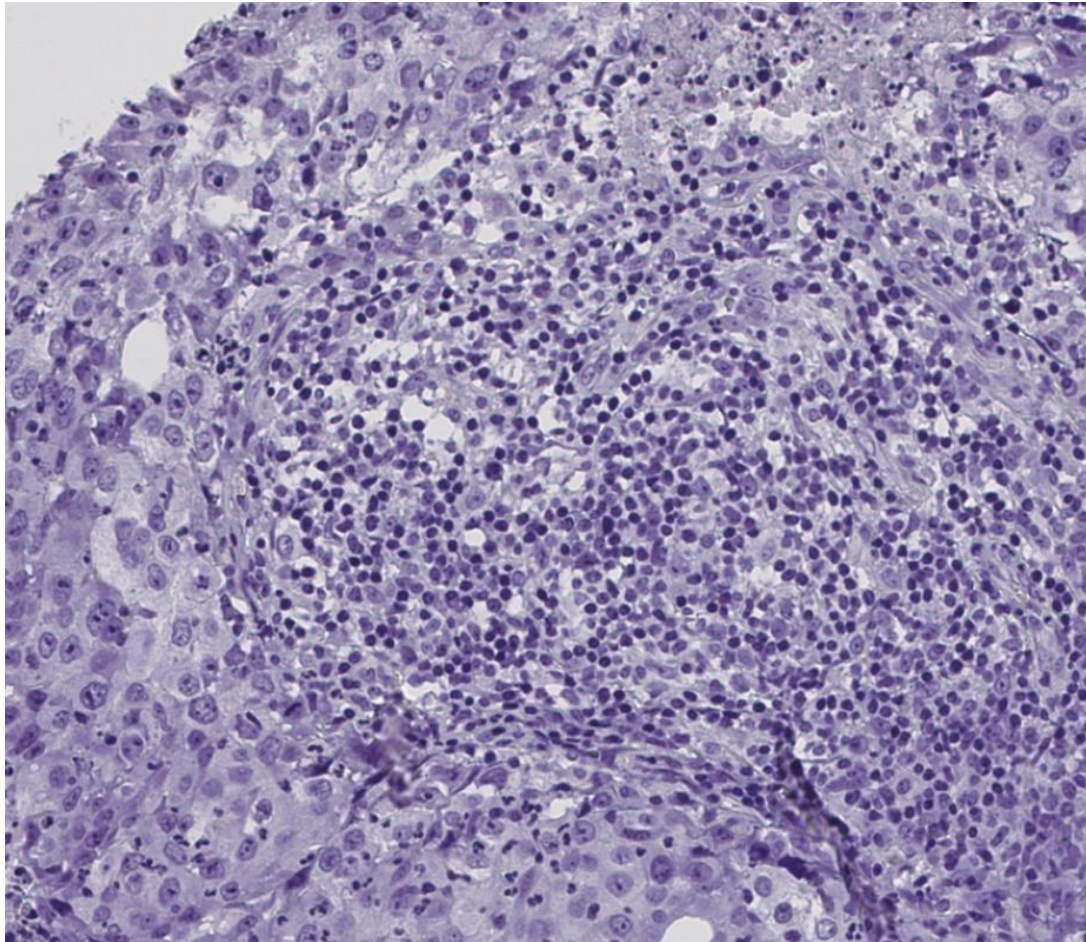



### **Protocol immunostaining PD-1**

Antibody: Cell Marque 315M-95 (NAT105) in a concentration of 1:50.

Tissue block was cut in 4 micrometer sections and then dried in 60°C for 1 hour.

Deparaffinization and pretreatment was performed in pressure cooker with buffer pH 6.

The following steps were performed in Autostainer *plus*, DAKO staining equipment with Dako kit K8010 solutions, (except for the primary antibody).

|                                    |          |
|------------------------------------|----------|
| Peroxidase Block                   | 5 min.   |
| Primary antibody                   | 30 min.  |
| EnVision (HRP-conjugated polymers) | 30 min.  |
| DAB Substrate-chromogen solution   | 2x5 min. |
| Hematoxylin (counterstain)         | 4 min.   |
| Dehydrate and coverslip            |          |

Between every step, rinse was performed with wash buffer.

### **Protocol immunostaining PD-L1**

Instrument: Benchmark Ultra from Ventana

Antibody: PD-L1 (SP142) (RTU) ref.no 740-4859

Pretreatment buffert: Ultra Cell Conditioning (CC1)/43min in 100 degrees C

Detetion kit: OptiView DAB IHC Detetion kit, ref no 760-700

OptiView Amplification Kit, ref no 860-099

Pretreatment buffert: ULTRA Cell Conditioning 1/CC1) 48min/100 degrees C

Antibody incubation: 16 min/37 degrees C

Background staining: Hematoxylin II/8min, ref no. 740-4859
